# Supplementary material
Source: Springer Nature journal article supplement (https://www.springermedizin.de/resource/supplementary/12874_2009_360_MOESM3_ESM.pdf/9434308)

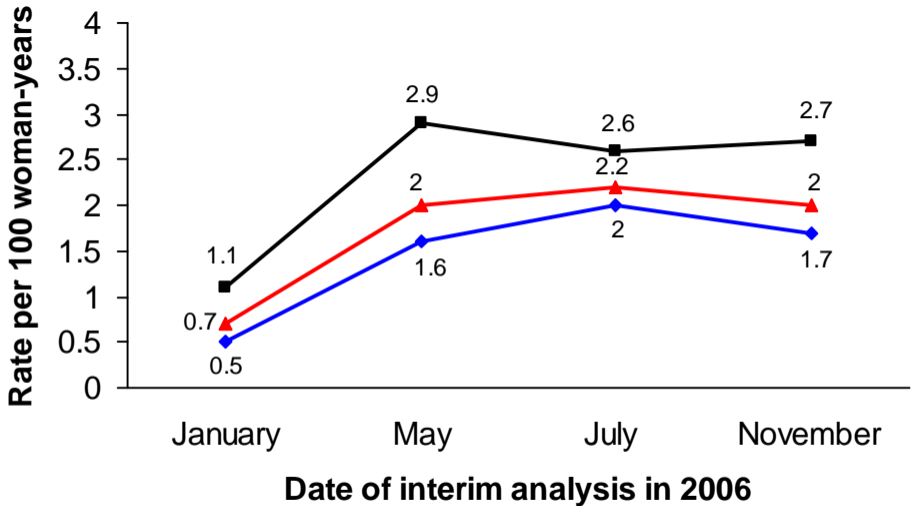

—◆— Central clinic —■— Peripheral clinic —▲— Port Harcourt pooled

Supplement: MOESM3 [file 9434308]
